# Supplementary figures and images for: Association of occupational exposures with cardiovascular disease among US Hispanics/Latinos
Source: PubMed Central journal article supplement — Heart. 2018 Dec 11;105(6):439–48. doi: 10.1136/heartjnl-2018-313463 (PMC6580877; doi:10.1136/heartjnl-2018-313463), 2018-12-11

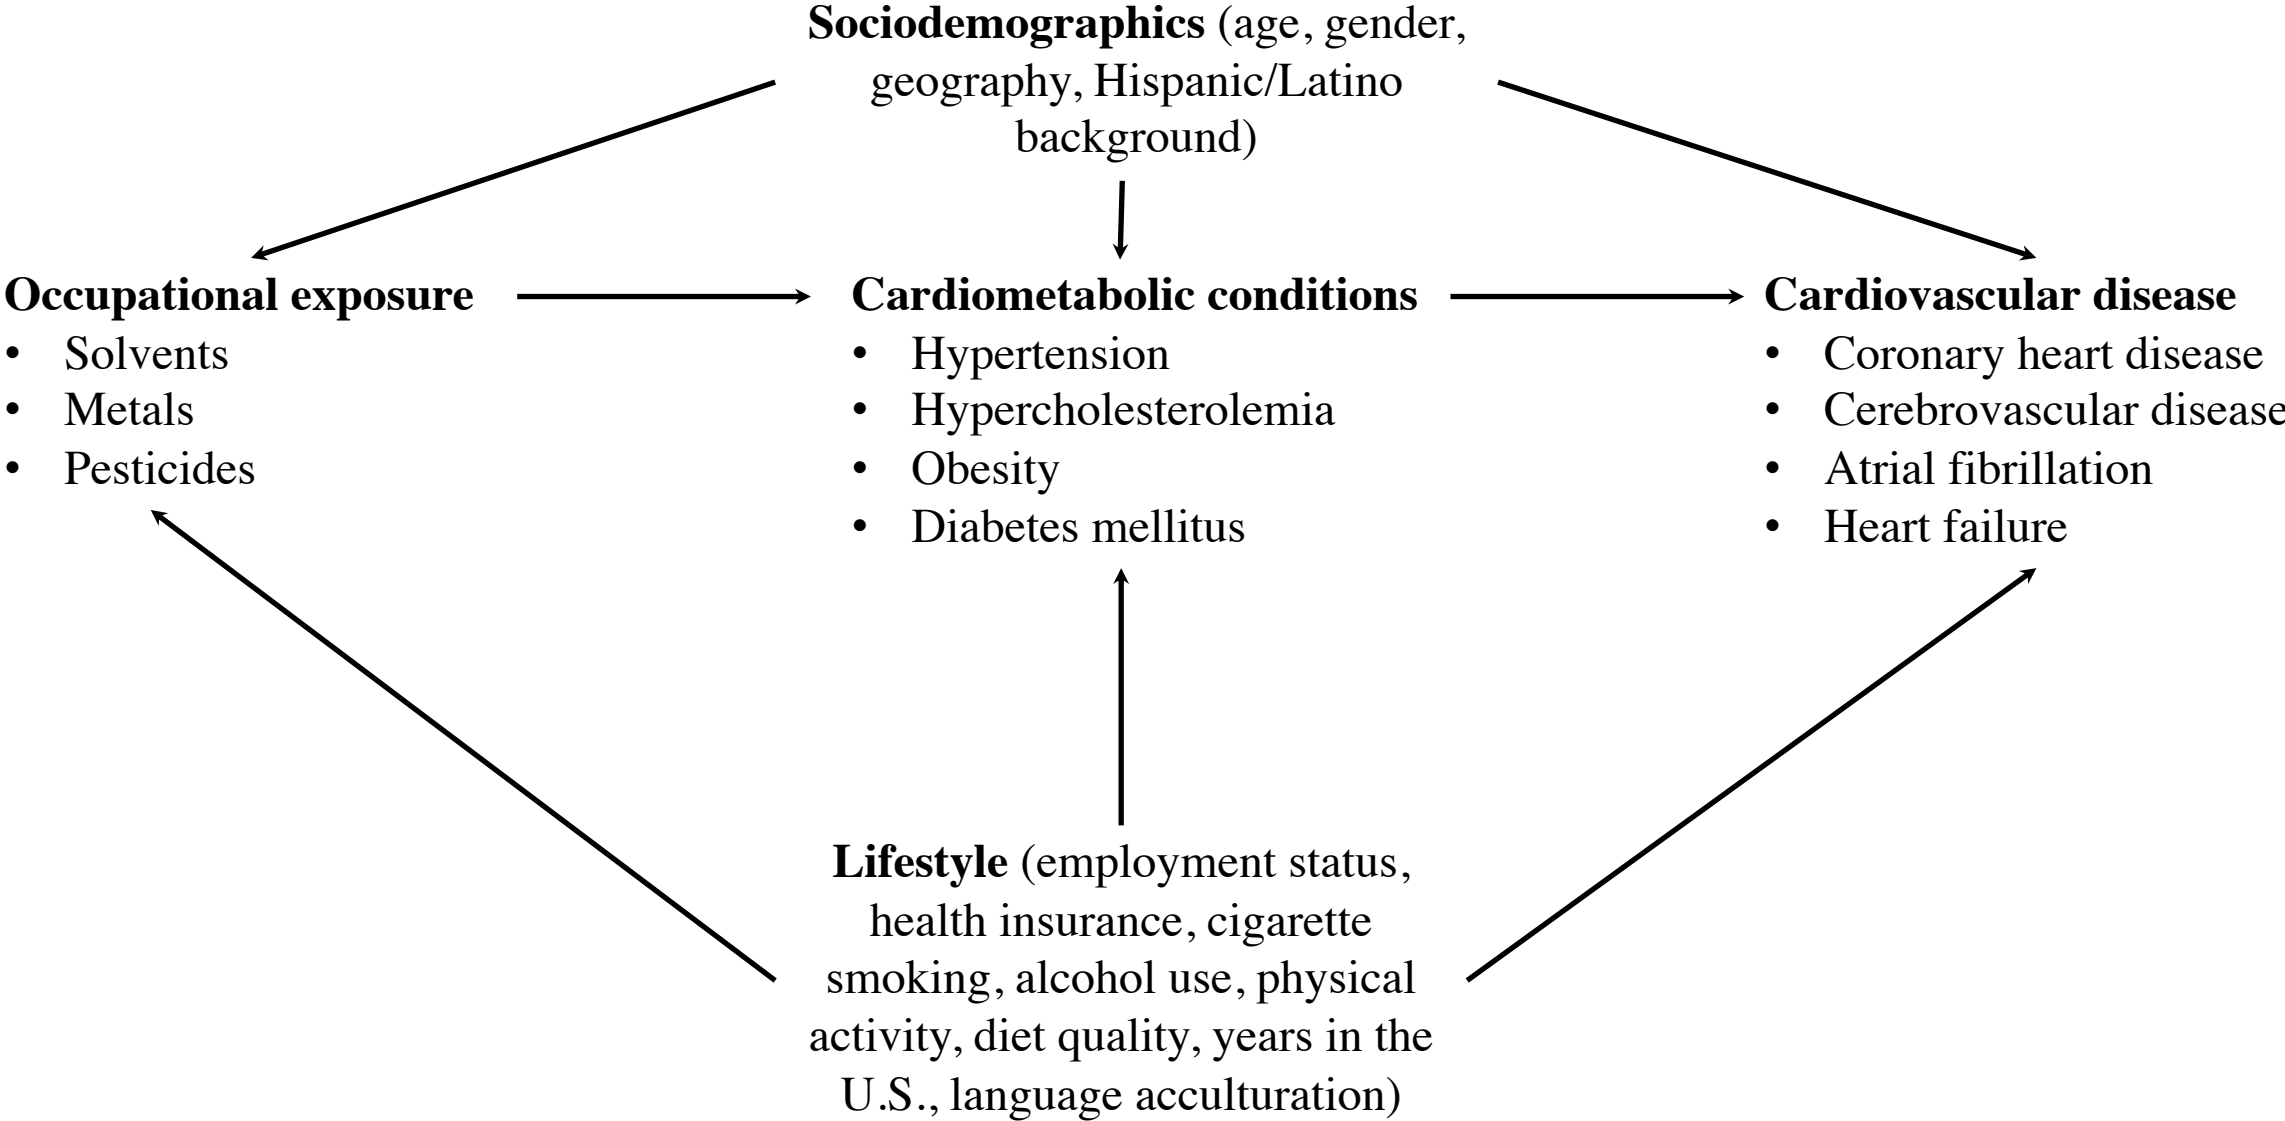

Supplement: heartjnl-2018-313463supp001.pdf [file heartjnl-2018-313463supp001.pdf]
